# Supplementary material for: A highly conserved segmental duplication in the subtelomeres of Plasmodium falciparum chromosomes varies in copy number
Source: PubMed Central journal article supplement (PMC2279139; doi:10.1186/1475-2875-7-46), 2008-03-07
Supplement: 1475-2875-7-46-S1.pdf [file 1475-2875-7-46-S1.pdf]

## Additional File 1. Groupings of the subtelomeric genes in 3D7 genome

| Rank | PlasmoDB ID | location | location | size | upstream | annotation                                                           | Group    | Pseudogene |
|------|-------------|----------|----------|------|----------|----------------------------------------------------------------------|----------|------------|
| 1    | PFA0005w    | 29733    | 37349    | 7616 | 1856     | erythrocyte membrane protein 1 (PFEMP1)                              | 1        |            |
| 2    | PFA0010c    | 39205    | 40430    | 1225 | 2160     | rifin                                                                | 2        |            |
| 3    | PFA0015c    | 42590    | 46730    | 4140 | 3856     | var-like protein                                                     | 1        |            |
| 4    | PFA0020w    | 50586    | 51859    | 1273 | 1533     | rifin                                                                | 2        |            |
| 5    | PFA0025c    | 53392    | 53503    | 111  | 498      | VAR fragment, pseudogene                                             | 1        | 1          |
| 6    | PFA0030c    | 54001    | 55229    | 1228 | 1684     | rifin                                                                | 2        |            |
| 7    | PFA0035c    | 56913    | 57116    | 203  | 2889     | hypothetical protein (truncated)                                     | 4        |            |
| 8    | PFA0040w    | 60005    | 61236    | 1231 | 1184     | rifin                                                                | 2        |            |
| 9    | PFA0045c    | 62420    | 63633    | 1213 | 2417     | rifin                                                                | 2        |            |
| 10   | PFA0050c    | 66050    | 67222    | 1172 | 2315     | rifin                                                                | 2        |            |
| 11   | PFA0055c    | 69537    | 70650    | 1113 | 1207     | hypothetical protein, conserved in <i>P. falciparum</i>              | n-gene   |            |
| 12   | PFA0060w    | 71857    | 72659    | 802  | 2362     | hypothetical protein, conserved in <i>P. falciparum</i>              | o-gene   |            |
| 13   | PFA0065w    | 75021    | 75599    | 578  | 616      | hypothetical protein, conserved in <i>P. falciparum</i>              | pfmc-2tm |            |
| 14   | PFA0070c    | 76215    | 77042    | 827  | 1432     | pseudogene, <i>P. falciparum</i> -specific conserved gene family     | q-gene   | 1          |
| 15   | PFA0075w    | 78474    | 80125    | 1651 | 1873     | VAR-fragment, pseudogene                                             | 1        | 1          |
| 16   | PFA0080c    | 81998    | 83339    | 1341 | 1685     | rifin                                                                | 2        |            |
| 17   | PFA0085c    | 85024    | 86385    | 1361 | 1051     | truncated var-related protein                                        | 1        | 1          |
| 18   | PFA0090c    | 87436    | 88410    | 974  | 2065     | stevor                                                               | 3        |            |
| 19   | PFA0095c    | 90475    | 91653    | 1178 | 1693     | rifin                                                                | 2        |            |
| 20   | PFA0100c    | 93346    | 94066    | 720  | 1191     | hypothetical protein (truncated)                                     | 4        |            |
| 21   | PFA0105w    | 95257    | 96046    | 789  | 3006     | stevor                                                               | 3        |            |
| 22   | PFA0110w    | 99052    | 102515   | 3463 | 2421     | ring-infected erythrocyte surface antigen precursor                  | 5        |            |
| 23   | PFA0115w    | 104936   | 105441   | 505  | 1988     | hypothetical protein                                                 | 8        |            |
| 24   | PFA0120c    | 107429   | 108580   | 1151 | 2404     | hypothetical protein                                                 | 9        |            |
| 25   | PFA0125c    | 110984   | 116033   | 5049 | 3242     | Ebl-1 like protein, putative                                         | 13       |            |
| 26   | PFA0130c    | 119275   | 121648   | 2373 | 3104     | FIKK1                                                                | 11       |            |
| 27   | PFA0135w    | 124752   | 125719   | 967  |          | hypothetical protein                                                 | 9        |            |
| 28   | PFA0655w    | 516313   | 519004   | 2691 | 3525     | SURFIN, surface-associated interspersed gene                         | 10       |            |
| 29   | PFA0660w    | 522529   | 524301   | 1772 | 4528     | dnj1/sis1 family                                                     | 12       |            |
| 30   | PFA0665w    | 528829   | 538073   | 9244 | 758      | hypothetical protein                                                 | 1        |            |
| 31   | PFA0670c    | 538831   | 539747   | 916  | 4455     | hypothetical protein (=MAL13P1.61)                                   | 6        |            |
| 32   | PFA0675w    | 544202   | 548705   | 4503 | 614      | hypothetical protein (C-terminus RESA-like with DNAJ domain)         | q-gene   |            |
| 33   | PFA0680c    | 549319   | 549879   | 560  | 2419     | hypothetical protein, conserved in <i>P. falciparum</i>              | pfmc-2tm |            |
| 34   | PFA0685c    | 552298   | 553435   | 1137 | 927      | hypothetical protein, conserved in <i>P. falciparum</i>              | o-gene   |            |
| 35   | PFA0690w    | 554362   | 555519   | 1157 | 83       | pseudogene, <i>P. falciparum</i> specific gene family                | n-gene   | 1          |
| 36   | PFA0695c    | 555602   | 556651   | 1049 | 3272     | VAR like pseudogene                                                  | 1        | 1          |
| 37   | PFA0700c    | 559923   | 560430   | 507  | 1766     | hypothetical protein, conserved in <i>P. falciparum</i> , pseudogene | 8        | 1          |
| 38   | PFA0705c    | 562196   | 563256   | 1060 | 2169     | STEVOR pseudogene                                                    | 3        | 1          |
| 39   | PFA0710c    | 565425   | 566564   | 1139 | 4642     | rifin                                                                | 2        |            |
| 40   | PFA0715c    | 571206   | 571993   | 787  | 1715     | hypothetical protein (= MAL8P1.160, MAL8P1.161)                      | 6        |            |
| 41   | PFA0720w    | 573708   | 574404   | 696  | 5020     | hypothetical protein                                                 | 9        |            |
| 42   | PFA0725w    | 579424   | 585509   | 6085 | 810      | SURFIN, surface-associated interspersed gene                         | 10       |            |
| 43   | PFA0730c    | 586319   | 586588   | 269  | 2523     | hypothetical protein                                                 | 9        |            |

| Rank | PlasmoDB ID | location | location | size | upstream | annotation                                         | Group    | Pseudogene |
|------|-------------|----------|----------|------|----------|----------------------------------------------------|----------|------------|
| 44   | PFA0735w    | 589111   | 590114   | 1003 | 3455     | hypothetical protein                               | 4        |            |
| 45   | PFA0740w    | 593569   | 594907   | 1338 | 1915     | rifin                                              | 2        |            |
| 46   | PFA0745w    | 596822   | 597993   | 1171 | 2192     | rifin                                              | 2        |            |
| 47   | PFA0750w    | 600185   | 601192   | 1007 | 1217     | stevor                                             | 3        |            |
| 48   | PFA0755w    | 602409   | 603712   | 1303 | 2170     | VAR related pseudogene                             | 1        | 1          |
| 49   | PFA0760w    | 605882   | 607251   | 1369 | 1859     | rifin                                              | 2        |            |
| 50   | PFA0765c    | 609110   | 616613   | 7503 |          | erythrocyte membrane protein 1 (PfEMP1)            | 1        |            |
| 51   | PFB0010w    | 25232    | 31168    | 5936 | 1862     | erythrocyte membrane protein 1 (PfEMP1)            | 1        |            |
| 52   | PFB0015c    | 33030    | 34259    | 1229 | 1668     | rifin                                              | 2        |            |
| 53   | PFB0020c    | 35927    | 37249    | 1322 | 1038     | erythrocyte membrane protein 1 (PfEMP1), truncated | 1        |            |
| 54   | PFB0025c    | 38287    | 39303    | 1016 | 2212     | stevor, putative                                   | 3        |            |
| 55   | PFB0030c    | 41515    | 42858    | 1343 | 2428     | rifin                                              | 2        |            |
| 56   | PFB0035c    | 45286    | 46800    | 1514 | 2123     | rifin                                              | 2        |            |
| 57   | PFB0040c    | 48923    | 50147    | 1224 | 1695     | rifin                                              | 2        |            |
| 58   | PFB0045c    | 51842    | 53124    | 1282 | 1294     | erythrocyte membrane protein 1 (PfEMP1), truncated | 1        |            |
| 59   | PFB0050c    | 54418    | 54936    | 518  | 2408     | stevor isoform gam beta                            | 3        |            |
| 60   | PFB0055c    | 57344    | 58421    | 1077 | 1686     | rifin                                              | 2        |            |
| 61   | PFB0056c    | 60107    | 60319    | 212  | 2838     | hypothetical protein, truncated                    | q-gene   |            |
| 62   | PFB0060w    | 63157    | 64376    | 1219 | 2174     | rifin                                              | 2        |            |
| 63   | PFB0065w    | 66550    | 67545    | 995  | 1543     | stevor, putative                                   | 3        |            |
| 64   | PFB0070w    | 69088    | 69771    | 683  | 3670     | hypothetical protein (=PFA0700c)                   | 7        |            |
| 65   | PFB0075c    | 73441    | 74396    | 955  | 2855     | hypothetical protein                               | 7        |            |
| 66   | PFB0080c    | 77251    | 78808    | 1557 | 2483     | hypothetical protein                               | 5        |            |
| 67   | PFB0085c    | 81291    | 84165    | 2874 | 2667     | hypothetical protein                               | 5        |            |
| 68   | PFB0090c    | 86832    | 88633    | 1801 | 2685     | hypothetical protein, conserved                    | 12       |            |
| 69   | PFB0095c    | 91318    | 98838    | 7520 | 4547     | erythrocyte membrane protein 3                     | 13       |            |
| 70   | PFB0100c    | 103385   | 105796   | 2411 | 3768     | knob associated histidine-rich protein             | 13       |            |
| 71   | PFB0105c    | 109564   | 110580   | 1016 | 1967     | hypothetical protein                               | 8        |            |
| 72   | PFB0106c    | 112547   | 113682   | 1135 | 3543     | hypothetical protein                               | 7        |            |
| 73   | PFB0110w    | 117225   | 118235   | 1010 | 2289     | hypothetical protein                               | 9        |            |
| 74   | PFB0115w    | 120524   | 124102   | 3578 | 3892     | hypothetical protein                               | 9        |            |
| 75   | PFB0120w    | 127994   | 128314   | 320  |          | etramp / sep                                       | 14       |            |
| 76   | PFB0925w    | 820427   | 822539   | 2112 | 1284     | hypothetical protein                               | 9        |            |
| 77   | PFB0926c    | 823823   | 824862   | 1039 | 6325     | hypothetical protein                               | 9        |            |
| 78   | PFB0930w    | 831187   | 832003   | 816  | 1800     | hypothetical protein                               | 7        |            |
| 79   | PFB0932w    | 833803   | 834686   | 883  | 4155     | hypothetical protein                               | 7        |            |
| 80   | PFB0935w    | 838841   | 844114   | 5273 | 746      | cytoadherence linked asexual protein 2             | 13       |            |
| 81   | PFB0946c    | 844860   | 845837   | 977  | 1650     | hypothetical protein                               | 9        |            |
| 82   | PFB0950w    | 847487   | 849117   | 1630 | 2305     | hypothetical protein                               | 9        |            |
| 83   | PFB0951w    | 851422   | 851960   | 538  | 3083     | hypothetical protein                               | 9        | 1          |
| 84   | PFB0953w    | 855043   | 855736   | 693  | 1697     | hypothetical protein                               | 6        |            |
| 85   | PFB0954c    | 857433   | 858043   | 610  | 412      | hypothetical protein                               | 9        |            |
| 86   | PFB1070w    | 858455   | 859069   | 614  | 1284     | hypothetical protein                               | 9        |            |
| 87   | PFB0955w    | 860353   | 861502   | 1149 | 1882     | stevor, degenerate, putative                       | 3        |            |
| 88   | PFB0960c    | 863384   | 863626   | 242  | 2288     | hypothetical protein                               | pfmc-2tm |            |
| 89   | PFB0965c    | 865914   | 866324   | 410  | 3182     | hypothetical protein                               | o-gene   |            |

| Rank | PlasmoDB ID | location | location | size | upstream | annotation                                                     | Group    | Pseudogene |
|------|-------------|----------|----------|------|----------|----------------------------------------------------------------|----------|------------|
| 90   | PFB0970c    | 869506   | 871122   | 1616 | 2007     | hypothetical protein (= PFB0926C)                              | 9        |            |
| 91   | PFB0972w    | 873129   | 873317   | 188  | 598      | hypothetical protein                                           | 9        |            |
| 92   | PFB0973c    | 873915   | 874109   | 194  | 20       | hypothetical protein                                           | 9        |            |
| 93   | PFB0974c    | 874129   | 874323   | 194  | 220      | erythrocyte membrane protein 1 (PfEMP1), truncated, degenerate | 1        |            |
| 94   | PFB0975c    | 874543   | 874809   | 266  | 154      | erythrocyte membrane protein 1 (PfEMP1), truncated             | 1        |            |
| 95   | PFB0976w    | 874963   | 875163   | 200  | 1819     | hypothetical protein (= PF10_0386)                             | 9        |            |
| 96   | PFB0980w    | 876982   | 877830   | 848  | 636      | hypothetical protein                                           | q-gene   |            |
| 97   | PFB0985c    | 878466   | 879249   | 783  | 2218     | hypothetical protein                                           | pfmc-2tm |            |
| 98   | PFB0990c    | 881467   | 882265   | 798  | 1272     | hypothetical protein                                           | o-gene   |            |
| 99   | PFB0995w    | 883537   | 884310   | 773  | 2605     | hypothetical protein                                           | n-gene   |            |
| 100  | PFB1000w    | 886915   | 887802   | 887  | 1858     | rifin                                                          | 2        |            |
| 101  | PFB1005w    | 889660   | 890745   | 1085 | 2111     | rifin                                                          | 2        |            |
| 102  | PFB1010w    | 892856   | 894206   | 1350 | 2020     | rifin                                                          | 2        |            |
| 103  | PFB1015w    | 896226   | 897420   | 1194 | 2031     | rifin                                                          | 2        |            |
| 104  | PFB1020w    | 899451   | 900445   | 994  | 1324     | stevor, putative                                               | 3        |            |
| 105  | PFB1025w    | 901769   | 902026   | 257  | 474      | erythrocyte membrane protein 1 (PfEMP1), truncated, degenerate | 1        |            |
| 106  | PFB1030w    | 902500   | 902853   | 353  | 1493     | hypothetical protein                                           | 1        |            |
| 107  | PFB1035w    | 904346   | 905775   | 1429 | 1903     | rifin                                                          | 2        |            |
| 108  | PFB1040w    | 907678   | 908861   | 1183 | 489      | rifin                                                          | 2        |            |
| 109  | PFB1045w    | 909350   | 911054   | 1704 | 2190     | erythrocyte membrane protein 1 (PfEMP1), truncated             | 1        |            |
| 110  | PFB1050w    | 913244   | 914457   | 1213 | 1895     | rifin                                                          | 2        |            |
| 111  | PFB1055c    | 916352   | 923648   | 7296 | 10358    | erythrocyte membrane protein 1 (PfEMP1)                        | 1        |            |
| 112  | PFB1060w    | 934006   | 936779   | 2773 | 3165     | hypothetical protein                                           | 9        |            |
| 113  | PFB1065c    | 939944   | 940511   | 567  |          | hypothetical protein                                           | 9        |            |
| 114  | PFC0002c    | 8394     | 10745    | 2351 | 22896    | hypothetical protein                                           | 9        |            |
| 115  | PFC0005w    | 33641    | 41158    | 7517 | 1887     | Var Protein, putative                                          | 1        |            |
| 116  | PFC0010c    | 43045    | 44255    | 1210 | 2193     | rifin                                                          | 2        |            |
| 117  | PFC0015c    | 46448    | 47828    | 1380 | 1128     | VARC pseudogene                                                | 1        | 1          |
| 118  | PFC0025c    | 48956    | 49949    | 993  | 2117     | stevor, putative                                               | 3        |            |
| 119  | PFC0030c    | 52066    | 53260    | 1194 | 4843     | rifin                                                          | 2        |            |
| 120  | PFC0035w    | 58103    | 59390    | 1287 | 1858     | rifin                                                          | 2        |            |
| 121  | PFC0040w    | 61248    | 62459    | 1211 | 2145     | rifin                                                          | 2        |            |
| 122  | PFC0045w    | 64604    | 65508    | 904  | 628      | rifin-like protein                                             | 2        |            |
| 123  | PFC0050c    | 66136    | 68595    | 2459 | 4577     | long chain fatty acid ligase, putative                         | 13       |            |
| 124  | PFC0055w    | 73172    | 74152    | 980  | 721      | hypothetical protein                                           | 9        |            |
| 125  | PFC0060c    | 74873    | 77071    | 2198 | 1618     | FIKK3                                                          | 11       |            |
| 126  | PFC0065c    | 78689    | 80193    | 1504 | 1654     | alpha/beta hydrolase protein, putative                         | 13       |            |
| 127  | PFC0070c    | 81847    | 82809    | 962  | 2119     | hypothetical protein                                           | 7        |            |
| 128  | PFC0075c    | 84928    | 85909    | 981  | 1884     | hypothetical protein                                           | 8        |            |
| 129  | PFC0080c    | 87793    | 90714    | 2921 | 2534     | hypothetical protein                                           | 9        |            |
| 130  | PFC0085c    | 93248    | 94587    | 1339 | 6418     | hypothetical protein, conserved                                | 7        |            |
| 131  | PFC0090w    | 101005   | 101961   | 956  | 632      | hypothetical protein, conserved                                | 8        |            |
| 132  | PFC0095c    | 102593   | 103789   | 1196 |          | hypothetical protein, conserved                                | 9        |            |
| 133  | PFC1070c    | 999860   | 1000734  | 874  | 1888     | VARC pseudogene                                                | 1        | 1          |
| 134  | PFC1075w    | 1002622  | 1003470  | 848  | 613      | hypothetical protein                                           | q-gene   |            |
| 135  | PFC1080c    | 1004083  | 1004872  | 789  | 2140     | hypothetical protein, conserved in <i>P. falciparum</i>        | pfmc-2tm |            |

| Rank | PlasmoDB ID | location | location | size  | upstream | annotation                                              | Group  | Pseudogene |
|------|-------------|----------|----------|-------|----------|---------------------------------------------------------|--------|------------|
| 136  | PFC1085c    | 1007012  | 1007810  | 798   | 1215     | hypothetical protein, conserved                         | o-gene |            |
| 137  | PFC1090w    | 1009025  | 1010134  | 1109  | 2331     | hypothetical protein, conserved in <i>P. falciparum</i> | n-gene |            |
| 138  | PFC1095w    | 1012465  | 1013612  | 1147  | 1932     | rifin (3D7-rifT3-5)                                     | 2      |            |
| 139  | PFC1100w    | 1015544  | 1016643  | 1099  | 2025     | rifin (3D7-rifT3-6)                                     | 2      |            |
| 140  | PFC1105w    | 1018668  | 1019678  | 1010  | 1046     | stevor (3D7-stevorT3-2)                                 | 3      |            |
| 141  | PFC1110w    | 1020724  | 1022081  | 1357  | 2160     | VARC pseudogene                                         | 1      | 1          |
| 142  | PFC1115w    | 1024241  | 1025599  | 1358  | 1893     | rifin (3D7-rifT3-7)                                     | 2      |            |
| 143  | PFC1120c    | 1027492  | 1034924  | 7432  | 11937    | var (3D7-varT3-2)                                       | 1      |            |
| 144  | PFC1125w    | 1046861  | 1050978  | 4117  |          | hypothetical protein                                    | 9      |            |
| 145  | PFD0005w    | 35153    | 44124    | 8971  | 4355     | erythrocyte membrane protein 1(PfEMP1)                  | 1      |            |
| 146  | PFD0015c    | 48479    | 49821    | 1342  | 2181     | rifin                                                   | 2      |            |
| 147  | PFD0020c    | 52002    | 63307    | 11305 | 2776     | erythrocyte membrane protein 1(PfEMP1)                  | 1      |            |
| 148  | PFD0025w    | 66083    | 67386    | 1303  | 2165     | rifin                                                   | 2      |            |
| 149  | PFD0030c    | 69551    | 70923    | 1372  | 2125     | rifin                                                   | 2      |            |
| 150  | PFD0035c    | 73048    | 74020    | 972   | 2388     | stevor                                                  | 3      |            |
| 151  | PFD0040c    | 76408    | 77560    | 1152  | 2155     | rifin                                                   | 2      |            |
| 152  | PFD0045c    | 79715    | 80787    | 1072  | 4853     | rifin                                                   | 2      |            |
| 153  | PFD0050w    | 85640    | 86898    | 1258  | 1796     | rifin                                                   | 2      |            |
| 154  | PFD0055w    | 88694    | 90022    | 1328  | 1822     | rifin                                                   | 2      |            |
| 155  | PFD0060w    | 91844    | 93055    | 1211  | 2545     | rifin                                                   | 2      |            |
| 156  | PFD0065w    | 95600    | 96631    | 1031  | 2392     | STEVOR pseudogene                                       | 3      | 1          |
| 157  | PFD0070c    | 99023    | 100256   | 1233  | 6878     | rifin                                                   | 2      |            |
| 158  | PFD0075w    | 107134   | 108560   | 1426  | 1632     | hypothetical protein                                    | 9      |            |
| 159  | PFD0080c    | 110192   | 112053   | 1861  | 2777     | hypothetical protein                                    | 5      |            |
| 160  | PFD0085c    | 114830   | 117745   | 2915  | 3307     | ATP-dept. acyl-coa synthetase, putative                 | 13     |            |
| 161  | PFD0090c    | 121052   | 122509   | 1457  |          | hypothetical protein                                    | 4      |            |
| 162  | PFD1120c    | 1075873  | 1076283  | 410   | 4503     | etramp / sep                                            | 14     |            |
| 163  | PFD1130w    | 1080786  | 1081973  | 1187  | 392      | hypothetical protein                                    | 9      |            |
| 164  | PFD1135c    | 1082365  | 1082927  | 562   | 2471     | hypothetical protein                                    | 9      |            |
| 165  | PFD1140w    | 1085398  | 1086628  | 1230  | 174      | hypothetical protein                                    | 8      |            |
| 166  | PFD1145c    | 1086802  | 1088589  | 1787  | 1830     | hypothetical protein                                    | 9      |            |
| 167  | PFD1150c    | 1090419  | 1095512  | 5093  | 2066     | hypothetical protein                                    | 9      |            |
| 168  | PFD1155w    | 1097578  | 1102275  | 4697  | 1976     | erythrocyte binding antigen, putative                   | 13     |            |
| 169  | PFD1160w    | 1104251  | 1111551  | 7300  | 2138     | SURFIN, surface-associated interspersed gene            | 10     |            |
| 170  | PFD1165w    | 1113689  | 1115922  | 2233  | 1052     | FIKK4.1                                                 | 11     |            |
| 171  | PFD1170c    | 1116974  | 1118115  | 1141  | 3944     | RESA-like protein, truncated                            | 5      |            |
| 172  | PFD1175w    | 1122059  | 1126043  | 3984  | 1571     | FIKK4.2 /R45                                            | 11     |            |
| 173  | PFD1180w    | 1127614  | 1128632  | 1018  | 2774     | trophozoite antigen r45-like protein, truncated         | 5      |            |
| 174  | PFD1185w    | 1131406  | 1132429  | 1023  | 858      | hypothetical protein                                    | 4      |            |
| 175  | PFD1190c    | 1133287  | 1133655  | 368   | 540      | hypothetical protein                                    | 9      |            |
| 176  | PFD1195c    | 1134195  | 1134520  | 325   | 3522     | hypothetical protein                                    | 9      |            |
| 177  | PFD1200c    | 1138042  | 1138802  | 760   | 1411     | hypothetical protein                                    | 7      |            |
| 178  | PFD1205w    | 1140213  | 1141012  | 799   | 4197     | hypothetical integral membrane protein                  | 9      |            |
| 179  | PFD1210w    | 1145209  | 1145718  | 509   | 1896     | hypothetical protein                                    | 4      |            |
| 180  | PFD1215w    | 1147614  | 1148446  | 832   | 1848     | hypothetical protein                                    | 4      |            |
| 181  | PFD1220c    | 1150294  | 1151319  | 1025  | 4807     | STEVOR                                                  | 3      |            |

| Rank | PlasmoDB ID | location | location | size  | upstream | annotation                                                    | Group    | Pseudogene |
|------|-------------|----------|----------|-------|----------|---------------------------------------------------------------|----------|------------|
| 182  | PFD1200w    | 1152896  | 1153810  | 914   | 6235     | RIF pseudogene, RIFIN pseudogene                              | 2        | 1          |
| 183  | PFD1230c    | 1156126  | 1157255  | 1129  | 2790     | RIFIN                                                         | 2        |            |
| 184  | PFD1235w    | 1160045  | 1171443  | 11398 | 2159     | erythrocyte membrane protein 1 (PfEMP1)                       | 1        |            |
| 185  | PFD1240w    | 1173602  | 1174806  | 1204  | 1869     | RIFIN                                                         | 2        |            |
| 186  | PFD1245c    | 1176675  | 1183848  | 7173  | 8906     | erythrocyte membrane protein 1 (PfEMP1)                       | 1        |            |
| 187  | PFD1250w    | 1192754  | 1195747  | 2993  |          | hypothetical protein, conserved in P falciparum               | 9        |            |
| 188  | PFE0005w    | 20929    | 28456    | 7527  | 777      | erythrocyte membrane protein 1 (PfEMP1)                       | 1        |            |
| 189  | PFE0010c    | 29233    | 29304    | 71    | 619      | VAR pseudogene                                                | 1        | 1          |
| 190  | PFE0015c    | 29923    | 30963    | 1040  | 2093     | RIF pseudogene                                                | 2        | 1          |
| 191  | PFE0020c    | 33056    | 34378    | 1322  | 2086     | rifin                                                         | 2        |            |
| 192  | PFE0025c    | 36464    | 37576    | 1112  | 1867     | rifin                                                         | 2        |            |
| 193  | PFE0030c    | 39443    | 40488    | 1045  | 641      | STEVOR pseudogene                                             | 3        | 1          |
| 194  | PFE0035c    | 41129    | 41403    | 274   | 1924     | RIF pseudogene                                                | 2        | 1          |
| 195  | PFE0040c    | 43327    | 47761    | 4434  | 2661     | MESA / PfEMP2                                                 | 13       |            |
| 196  | PFE0045c    | 50422    | 52510    | 2088  | 3331     | FIKK5                                                         | 11       |            |
| 197  | PFE0050w    | 55841    | 56872    | 1031  | 1082     | hypothetical protein                                          | 8        |            |
| 198  | PFE0055c    | 57954    | 59726    | 1772  | 4339     | heat shock protein, putative                                  | 12       |            |
| 199  | PFE0060w    | 64065    | 65489    | 1424  | 3441     | hypothetical protein                                          | 6        |            |
| 200  | PFE0065w    | 68930    | 70113    | 1183  | 4396     | skeleton binding protein                                      | 13       |            |
| 201  | PFE0070w    | 74509    | 79842    | 5333  |          | interspersed repeat antigen, putative                         | 13       |            |
| 202  | PFE1590w    | 1301219  | 1301764  | 545   | 1893     | etramp                                                        | 14       |            |
| 203  | PFE1595c    | 1303657  | 1304521  | 864   | 3752     | hypothetical protein                                          | 9        |            |
| 204  | PFE1600w    | 1308273  | 1309935  | 1662  | 2531     | hypothetical protein                                          | 5        |            |
| 205  | PFE1605w    | 1312466  | 1314149  | 1683  | 2188     | protein with DNAJ domain                                      | 5        |            |
| 206  | PFE1610w    | 1316337  | 1316841  | 504   | 1685     | hypothetical protein                                          | 8        |            |
| 207  | PFE1615c    | 1318526  | 1318984  | 458   | 3411     | hypothetical protein                                          | 8        |            |
| 208  | PFE1620c    | 1322395  | 1322718  | 323   | 77       | VAR fragment, pseudogene                                      | 1        | 1          |
| 209  | PFE1625c    | 1322795  | 1323082  | 287   | 3158     | VAR fragment, pseudogene                                      | 1        | 1          |
| 210  | PFE1630w    | 1326240  | 1327424  | 1184  | 2172     | rifin                                                         | 2        |            |
| 211  | PFE1635w    | 1329596  | 1330803  | 1207  | 2662     | RIF pseudogene                                                | 2        | 1          |
| 212  | PFE1640w    | 1333465  | 1342959  | 9494  |          | erythrocyte membrane protein 1 (PfEMP1),truncated, pseudogene | 1        | 1          |
| 213  | PFF0005c    | 653      | 1432     | 779   | 2071     | PfEMP1, truncated (pseudogene)                                | 1        | 1          |
| 214  | PFF0010w    | 3503     | 12835    | 9332  | 2230     | erythrocyte membrane protein 1 (PfEMP1)                       | 1        |            |
| 215  | PFF0015c    | 15065    | 16410    | 1345  | 2176     | rifin                                                         | 2        |            |
| 216  | PFF0020c    | 18586    | 22721    | 4135  | 3836     | PfEMP1-like protein                                           | 1        |            |
| 217  | PFF0025w    | 26557    | 27830    | 1273  | 3038     | rifin                                                         | 2        |            |
| 218  | PFF0030c    | 30868    | 31484    | 616   | 481      | PfEMP1, truncated (pseudogene)                                | 1        | 1          |
| 219  | PFF0035c    | 31965    | 33244    | 1279  | 2111     | rifin                                                         | 2        |            |
| 220  | PFF0040c    | 35355    | 36613    | 1258  | 2108     | RIFIN, frameshifted (pseudogene)                              | 2        | 1          |
| 221  | PFF0045c    | 38721    | 39781    | 1060  | 2316     | RIF, pseudogene                                               | 2        | 1          |
| 222  | PFF0050c    | 42097    | 43218    | 1121  | 1229     | hypothetical protein, conserved in P. falciparum              | n-gene   |            |
| 223  | PFF0055w    | 44447    | 45213    | 766   | 2247     | hypothetical protein, conserved in P. falciparum              | o-gene   |            |
| 224  | PFF0060w    | 47460    | 48255    | 795   | 616      | hypothetical protein, conserved in P. falciparum              | pfmc-2tm |            |
| 225  | PFF0065c    | 48871    | 49719    | 848   | 1629     | hypothetical protein, conserved in P. falciparum              | q-gene   |            |
| 226  | PFF0070w    | 51348    | 52895    | 1547  | 12890    | PfEMP1, internal fragment (pseudogene)                        | 1        | 1          |
| 227  | PFF0075c    | 65785    | 67392    | 1607  | 1438     | hypothetical protein                                          | 5        |            |

| Rank | PlasmoDB ID | location | location | size  | upstream | annotation                                                      | Group    | Pseudogene |
|------|-------------|----------|----------|-------|----------|-----------------------------------------------------------------|----------|------------|
| 228  | PFF0080c    | 68830    | 69690    | 860   | 1255     | hypothetical protein, conserved                                 | 9        |            |
| 229  | PFF0085w    | 70945    | 71932    | 987   | 6255     | hypothetical protein                                            | 4        |            |
| 230  | PFF0090w    | 78187    | 78781    | 594   | 1219107  | hypothetical protein                                            | 9        |            |
| 231  | PFF1510w    | 1297888  | 1299376  | 1488  | 14335    | hypothetical protein                                            | 5        |            |
| 232  | PFF1515c    | 1313711  | 1315256  | 1545  | 1620     | VAR pseudogene                                                  | 1        | 1          |
| 233  | PFF1520w    | 1316876  | 1317724  | 848   | 609      | hypothetical protein, conserved in <i>P. falciparum</i>         | q-gene   |            |
| 234  | PFF1525c    | 1318333  | 1319119  | 786   | 2204     | hypothetical protein, conserved in <i>P. falciparum</i>         | pfmc-2tm |            |
| 235  | PFF1530c    | 1321323  | 1322097  | 774   | 1200     | hypothetical protein, conserved in <i>P. falciparum</i>         | o-gene   |            |
| 236  | PFF1535w    | 1323297  | 1324438  | 1141  | 2544     | hypothetical protein, conserved in <i>P. falciparum</i>         | n-gene   |            |
| 237  | PFF1540w    | 1326982  | 1327947  | 965   | 1551     | rifin (pseudogene)                                              | 2        | 1          |
| 238  | PFF1545w    | 1329498  | 1330966  | 1468  | 2071     | RIFIN                                                           | 2        |            |
| 239  | PFF1550w    | 1333037  | 1334038  | 1001  | 2111     | stevor                                                          | 3        |            |
| 240  | PFF1555w    | 1336149  | 1337476  | 1327  | 745      | rifin                                                           | 2        |            |
| 241  | PFF1560c    | 1338221  | 1339420  | 1199  | 1890     | rifin                                                           | 2        |            |
| 242  | PFF1565c    | 1341310  | 1342598  | 1288  | 4746     | rifin                                                           | 2        |            |
| 243  | PFF1570w    | 1347344  | 1348574  | 1230  | 2153     | rifin                                                           | 2        |            |
| 244  | PFF1575w    | 1350727  | 1352090  | 1363  | 1858     | rifin                                                           | 2        |            |
| 245  | PFF1580c    | 1353948  | 1366431  | 12483 | 1482     | erythrocyte membrane protein 1 (PfEMP1)                         | 1        |            |
| 246  | PFF1585w    | 1367913  | 1369105  | 1192  | 2397     | rifin (pseudogene)                                              | 2        | 1          |
| 247  | PFF1590w    | 1371502  | 1372862  | 1360  | 1936     | RIFIN                                                           | 2        |            |
| 248  | PFF1595c    | 1374798  | 1382628  | 7830  |          | erythrocyte membrane protein 1 (PfEMP1)                         | 1        |            |
| 249  | MAL7P1.212  | 30673    | 38328    | 7655  | 1862     | erythrocyte membrane protein 1 (PfEMP1)                         | 1        |            |
| 250  | MAL7P1.213  | 40190    | 41426    | 1236  | 2263     | RIFIN                                                           | 2        |            |
| 251  | MAL7P1.214  | 43689    | 44791    | 1102  | 1196     | VAR pseudogene fragment                                         | 1        | 1          |
| 252  | MAL7P1.215  | 45987    | 47238    | 1251  | 4808     | RIFIN                                                           | 2        |            |
| 253  | MAL7P1.216  | 52046    | 53305    | 1259  | 2026     | RIFIN                                                           | 2        |            |
| 254  | MAL7P1.217  | 55331    | 56518    | 1187  | 2156     | RIFIN                                                           | 2        |            |
| 255  | MAL7P1.218  | 58674    | 59684    | 1010  | 2142     | STEVOR                                                          | 3        |            |
| 256  | MAL7P1.219  | 61826    | 62909    | 1083  | 1702     | RIFIN                                                           | 2        |            |
| 257  | MAL7P1.220  | 64611    | 65302    | 691   | 1666     | hypothetical protein, conserved in <i>P. falciparum</i>         | 4        |            |
| 258  | MAL7P1.310  | 66968    | 68132    | 1164  | 2124     | Stevor, putative, degenerate                                    | 3        |            |
| 259  | MAL7P1.222  | 70256    | 71400    | 1144  | 1469     | RIFIN                                                           | 2        |            |
| 260  | MAL7P1.223  | 72869    | 74407    | 1538  | 1675     | STEVOR, putative                                                | 3        |            |
| 261  | MAL7P1.224  | 76082    | 76953    | 871   | 3878     | hypothetical protein, conserved in <i>P. falciparum</i>         | 4        |            |
| 262  | MAL7P1.225  | 80831    | 81798    | 967   | 4592     | hypothetical protein, conserved in <i>P. falciparum</i>         | 4        |            |
| 263  | MAL7P1.226  | 86390    | 87344    | 954   | 2248     | RIFIN, pseudogene                                               | 2        | 1          |
| 264  | MAL7P1.227  | 89592    | 90621    | 1029  | 1514     | STEVOR                                                          | 3        |            |
| 265  | MAL7P1.230  | 92135    | 93136    | 1001  | 5819     | hypothetical protein, conserved in <i>Plasmodium falciparum</i> | 9        | 1          |
| 266  | MAL7P1.321  | 98955    | 100278   | 1323  | 5560     | hypothetical protein                                            | 9        |            |
| 267  | MAL7P1.228  | 105838   | 108528   | 2690  | 1866     | Heat Shock 70 KDa Protein, (HSP70)                              | 12       |            |
| 268  | MAL7P1.229  | 110394   | 115698   | 5304  | 2023     | Cytoadherence linked asexual protein (Clag)                     | 13       |            |
| 269  | MAL7P1.200  | 117721   | 118781   | 1060  | 2325     | RIFIN                                                           | 2        |            |
| 270  | MAL7P1.3    | 121106   | 122238   | 1132  | 1212     | hypothetical protein, conserved in <i>P. falciparum</i>         | n-gene   |            |
| 271  | MAL7P1.4    | 123450   | 124218   | 768   | 2209     | hypothetical protein, conserved in <i>P. falciparum</i>         | o-gene   |            |
| 272  | MAL7P1.5    | 126427   | 127238   | 811   | 617      | hypothetical protein, conserved in <i>P. falciparum</i>         | pfmc-2tm |            |
| 273  | PF07_0002   | 127855   | 128703   | 848   | 2593     | hypothetical protein, conserved in <i>P. falciparum</i>         | q-gene   |            |

| Rank | PlasmoDB ID | location | location | size  | upstream | annotation                                                             | Group | Pseudogene |
|------|-------------|----------|----------|-------|----------|------------------------------------------------------------------------|-------|------------|
| 274  | PF07_0003   | 131296   | 132433   | 1137  |          | RIFIN                                                                  | 2     |            |
| 275  | MAL7P1.170  | 1376684  | 1377745  | 1061  | 3008     | ring stage expressed protein                                           | 13    |            |
| 276  | MAL7P1.171  | 1380753  | 1387191  | 6438  | 7146     | hypothetical protein                                                   | 8     |            |
| 277  | MAL7P1.172  | 1394337  | 1397168  | 2831  | 1052     | hypothetical protein                                                   | 8     |            |
| 278  | MAL7P1.173  | 1398220  | 1399374  | 1154  | 6036     | hypothetical protein                                                   | 7     |            |
| 279  | MAL7P1.174  | 1405410  | 1406527  | 1117  | 2609     | hypothetical protein                                                   | 5     |            |
| 280  | MAL7P1.175  | 1409136  | 1410860  | 1724  | 2573     | FIKK7.2                                                                | 11    | 1          |
| 281  | MAL7P1.176  | 1413433  | 1417946  | 4513  | 5593     | erythrocyte binding antigen                                            | 13    |            |
| 282  | PF07_0129   | 1423539  | 1425974  | 2435  | 1467     | ATP-dept. acyl-coa synthetase                                          | 13    |            |
| 283  | MAL7P1.177  | 1427441  | 1428138  | 697   | 6168     | predicted integral membrane protein, conserved in <i>P. falciparum</i> | 7     |            |
| 284  | MAL7P1.178  | 1434306  | 1436147  | 1841  | 4866     | hypothetical protein (= PF10_0018, PF10_0020, PF13_0153)               | 9     |            |
| 285  | PF07_0130   | 1441013  | 1442004  | 991   | 1127     | stevor                                                                 | 3     |            |
| 286  | MAL7P1.183  | 1443131  | 1444415  | 1284  | 1674     | VAR pseudogene                                                         | 1     | 1          |
| 287  | PF07_0132   | 1446089  | 1447421  | 1332  | 4394     | Rifin                                                                  | 2     |            |
| 288  | MAL7P1.184  | 1451815  | 1453017  | 1202  | 1813     | rifin                                                                  | 2     |            |
| 289  | PF07_0134   | 1454830  | 1456060  | 1230  | 1941     | rifin                                                                  | 2     |            |
| 290  | MAL7P1.185  | 1458001  | 1459356  | 1355  | 2875     | rifin                                                                  | 2     |            |
| 291  | MAL7P1.350  | 1462231  | 1462440  | 209   | 1719     | hypothetical protein                                                   | 4     |            |
| 292  | PF07_0136   | 1464159  | 1465352  | 1193  | 461      | rifin                                                                  | 2     |            |
| 293  | MAL7P1.186  | 1465813  | 1467609  | 1796  | 2203     | Var-like                                                               | 1     |            |
| 294  | PF07_0138   | 1469812  | 1471061  | 1249  | 1905     | rifin                                                                  | 2     |            |
| 295  | MAL7P1.187  | 1472966  | 1481612  | 8646  |          | erythrocyte membrane protein 1 (PfEMP1)                                | 1     |            |
| 296  | MAL8P1.164  | 9315     | 12632    | 3317  | 9737     | hypothetical protein conserved                                         | 9     |            |
| 297  | PF08_0142   | 22369    | 29661    | 7292  | 1047     | erythrocyte membrane protein 1 (PfEMP1)                                | 1     |            |
| 298  | PF08_0141   | 30708    | 40041    | 9333  | 1915     | erythrocyte membrane protein 1 (PfEMP1)                                | 1     |            |
| 299  | PF08_0140   | 41956    | 51947    | 9991  | 1820     | erythrocyte membrane protein 1 (PfEMP1)                                | 1     |            |
| 300  | PF08_0139   | 53767    | 55102    | 1335  | 2374     | RIFIN                                                                  | 2     |            |
| 301  | PF08_0138   | 57476    | 58827    | 1351  | 3435     | RIFIN                                                                  | 2     |            |
| 302  | MAL8P1.163  | 62262    | 63259    | 997   | 3581     | hypothetical protein                                                   | 4     |            |
| 303  | MAL8P1.162  | 66840    | 72909    | 6069  | 8038     | SURFIN, surface-associated interspersed gene                           | 10    |            |
| 304  | MAL8P1.161  | 80947    | 81766    | 819   | 2195     | hypothetical protein                                                   | 6     |            |
| 305  | MAL8P1.160  | 83961    | 85028    | 1067  | 664      | hypothetical protein                                                   | 9     |            |
| 306  | PF08_0137   | 85692    | 89546    | 3854  |          | hypothetical protein                                                   | 9     |            |
| 307  | PF08_0002   | 1311708  | 1318026  | 6318  | 645      | SURFIN, surface-associated interspersed gene                           | 10    |            |
| 308  | PF08_0001   | 1318671  | 1319412  | 741   | 3076     | hypothetical protein                                                   | 8     |            |
| 309  | MAL8P1.2    | 1322488  | 1323896  | 1408  | 2319     | hypothetical protein with DNAJ domain                                  | 5     |            |
| 310  | MAL8P1.1    | 1326215  | 1332258  | 6043  | 2061     | SURFIN, surface-associated interspersed gene                           | 10    |            |
| 311  | MAL8P1.204  | 1334319  | 1337370  | 3051  | 3161     | hypothetical protein                                                   | 9     |            |
| 312  | MAL8P1.205  | 1340531  | 1343377  | 2846  | 2099     | hypothetical protein                                                   | 8     |            |
| 313  | MAL8P1.206  | 1345476  | 1346558  | 1082  | 2570     | hypothetical protein, conserved in <i>P. falciparum</i>                | 7     |            |
| 314  | MAL8P1.207  | 1349128  | 1360526  | 11398 | 2157     | erythrocyte membrane protein 1, PfEMP1                                 | 1     |            |
| 315  | MAL8P1.208  | 1362683  | 1364025  | 1342  | 1880     | RIFIN                                                                  | 2     |            |
| 316  | MAL8P1.209  | 1365905  | 1366306  | 401   | 661      | VAR-like protein                                                       | 1     |            |
| 317  | MAL8P1.210  | 1366967  | 1367167  | 200   | 70       | hypothetical protein, conserved in <i>P. falciparum</i>                | 9     |            |
| 318  | MAL8P1.211  | 1367237  | 1367455  | 218   | 1254     | hypothetical protein, conserved in <i>P. falciparum</i>                | 9     |            |
| 319  | MAL8P1.212  | 1368709  | 1369392  | 683   | 59       | RESA-like pseudogene                                                   | 13    | 1          |

| Rank | PlasmoDB ID | location | location | size | upstream | annotation                                              | Group     | Pseudogene |
|------|-------------|----------|----------|------|----------|---------------------------------------------------------|-----------|------------|
| 320  | MAL8P1.320  | 1369451  | 1369762  | 311  | 673      | hypothetical protein                                    | q-gene    |            |
| 321  | MAL8P1.213  | 1370435  | 1371241  | 806  | 1696     | hypothetical protein, conserved in <i>P. falciparum</i> | pfmtc-2tm |            |
| 322  | MAL8P1.214  | 1372937  | 1373982  | 1045 | 1419     | Stever pseudogene, putative                             | 3         | 1          |
| 323  | MAL8P1.215  | 1375401  | 1376349  | 948  | 1739     | hypothetical protein, conserved in <i>P. falciparum</i> | 4         |            |
| 324  | MAL8P1.216  | 1378088  | 1379253  | 1165 | 1942     | hypothetical protein, conserved in <i>P. falciparum</i> | 2         |            |
| 325  | MAL8P1.217  | 1381195  | 1382619  | 1424 | 2118     | STEVOR                                                  | 3         |            |
| 326  | MAL8P1.218  | 1384737  | 1385956  | 1219 | 2316     | RIFIN                                                   | 2         |            |
| 327  | MAL8P1.219  | 1388272  | 1389444  | 1172 | 2014     | RIFIN                                                   | 2         |            |
| 328  | MAL8P1.220  | 1391458  | 1399234  | 7776 | 8634     | erythrocyte membrane protein 1 (PFEMP1)                 | 1         |            |
| 329  | MAL8P1.335  | 1407868  | 1410774  | 2906 | 2006     | hypothetical protein, conserved in <i>P. falciparum</i> | 9         |            |
| 330  | MAL8P1.330  | 1412780  | 1413400  | 620  |          | hypothetical protein                                    | 9         |            |
| 331  | PFI0002w    | 4171     | 4620     | 449  | 15460    | hypothetical proein conserved in <i>P. falciparum</i>   | 9         |            |
| 332  | PFI0005w    | 20080    | 27885    | 7805 | 1912     | erythrocyte membrane protein 1 (PFEMP1)                 | 1         |            |
| 333  | PFI0010c    | 29797    | 31157    | 1360 | 2396     | RIFIN                                                   | 2         |            |
| 334  | PFI0015c    | 33553    | 34795    | 1242 | 4759     | RIFIN                                                   | 2         |            |
| 335  | PFI0020w    | 39554    | 40740    | 1186 | 2169     | RIFIN                                                   | 2         |            |
| 336  | PFI0025c    | 42909    | 44045    | 1136 | 1857     | RIFIN                                                   | 2         |            |
| 337  | PFI0030c    | 45902    | 47236    | 1334 | 2376     | RIFIN                                                   | 2         |            |
| 338  | PFI0035c    | 49612    | 50971    | 1359 | 1677     | RIFIN                                                   | 2         |            |
| 339  | PFI0040c    | 52648    | 54024    | 1376 | 1050     | VARC-like pseudogene                                    | 1         | 1          |
| 340  | PFI0045c    | 55074    | 56060    | 986  | 2102     | stevor                                                  | 3         |            |
| 341  | PFI0050c    | 58162    | 59240    | 1078 | 2102     | RIFIN                                                   | 2         |            |
| 342  | PFI0055c    | 61342    | 62553    | 1211 | 1663     | RIFIN                                                   | 2         |            |
| 343  | PFI0060c    | 64216    | 64428    | 212  | 2906     | hypothetical protein                                    | 4         |            |
| 344  | PFI0065w    | 67334    | 68625    | 1291 | 1896     | RIFIN                                                   | 2         |            |
| 345  | PFI0070w    | 70521    | 71738    | 1217 | 2671     | RIFIN                                                   | 2         |            |
| 346  | PFI0075w    | 74409    | 75746    | 1337 | 2115     | RIFIN                                                   | 2         |            |
| 347  | PFI0080w    | 77861    | 78874    | 1013 | 3128     | stevor                                                  | 3         |            |
| 348  | PFI0085c    | 82002    | 82594    | 592  | 4179     | hypothetical protein                                    | n-gene    |            |
| 349  | PFI0090c    | 86773    | 88074    | 1301 | 1286     | hypothetical protein                                    | 9         |            |
| 350  | PFI0095c    | 89360    | 91294    | 1934 | 2535     | FIKK9.1                                                 | 11        |            |
| 351  | PFI0100c    | 93829    | 95612    | 1783 | 2789     | FIKK9.2                                                 | 11        |            |
| 352  | PFI0105c    | 98401    | 100338   | 1937 | 2153     | FIKK9.3                                                 | 11        |            |
| 353  | PFI0110c    | 102491   | 104592   | 2101 | 2063     | FIKK9.4                                                 | 11        |            |
| 354  | PFI0115c    | 106655   | 108405   | 1750 | 928      | FIKK9.5                                                 | 11        |            |
| 355  | PFI0120c    | 109333   | 111328   | 1995 | 2080     | FIKK9.6                                                 | 11        |            |
| 356  | PFI0125c    | 113408   | 115548   | 2140 | 3712     | FIKK9.7                                                 | 11        |            |
| 357  | PFI0130c    | 119260   | 120748   | 1488 | 872      | hypothetical protein                                    | 5         |            |
| 358  | PFI0135c    | 121620   | 125005   | 3385 | 2410     | papain family cysteine protease, putative               | 13        |            |
| 359  | PFI0140w    | 127415   | 127723   | 308  |          | hypothetical protein                                    | 9         |            |
| 360  | PFI1730w    | 1413829  | 1419743  | 5914 | 729      | cytoadherence linked asexual protein (CLAG)             | 13        |            |
| 361  | PFI1735c    | 1420472  | 1422796  | 2324 | 4667     | hypothetical protein (REX 1)                            | 9         |            |
| 362  | PFI1740c    | 1427463  | 1428011  | 548  | 2585     | hypothetical protein (REX 2)                            | 9         |            |
| 363  | PFI1745c    | 1430596  | 1431135  | 539  | 2186     | hypothetical protein                                    | 9         |            |
| 364  | PFI1750c    | 1433321  | 1434097  | 776  | 2579     | hypothetical protein                                    | 8         |            |
| 365  | PFI1755c    | 1436676  | 1437970  | 1294 | 2802     | hypothetical protein (REX 3)                            | 8         |            |

| Rank | PlasmoDB ID | location | location | size | upstream | annotation                                         | Group | Pseudogene |
|------|-------------|----------|----------|------|----------|----------------------------------------------------|-------|------------|
| 366  | PF11760w    | 1440772  | 1441649  | 877  | 2607     | hypothetical protein (REX 4)                       | 8     |            |
| 367  | PF11765c    | 1444256  | 1444835  | 579  | 2082     | hypothetical protein                               | 8     |            |
| 368  | PF11770w    | 1446917  | 1447935  | 1018 | 6475     | hypothetical protein                               | 8     |            |
| 369  | PF11775w    | 1454410  | 1455708  | 1298 | 2672     | hypothetical protein                               | 9     |            |
| 370  | PF11780w    | 1458380  | 1459850  | 1470 | 2538     | hypothetical protein                               | 8     |            |
| 371  | PF11785w    | 1462388  | 1463647  | 1259 | 2455     | hypothetical protein                               | 8     |            |
| 372  | PF11790w    | 1466102  | 1467043  | 941  | 1491     | hypothetical protein                               | 5     |            |
| 373  | PF11795c    | 1468534  | 1469405  | 871  | 2434     | hypothetical protein                               | 6     |            |
| 374  | PF11800w    | 1471839  | 1472912  | 1073 | 1507     | enzyme, putative                                   | 9     |            |
| 375  | PF11805w    | 1474419  | 1475692  | 1273 | 1822     | rifin                                              | 2     |            |
| 376  | PF11810w    | 1477514  | 1478724  | 1210 | 2211     | rifin                                              | 3     |            |
| 377  | PF11815c    | 1480935  | 1482199  | 1264 | 3859     | rifin                                              | 2     |            |
| 378  | PF11820w    | 1486058  | 1490175  | 4117 | 2186     | erythrocyte membrane protein 1(PfEMP1)             | 1     |            |
| 379  | PF11825w    | 1492361  | 1493696  | 1335 | 1871     | rifin                                              | 2     |            |
| 380  | PF11830c    | 1495567  | 1503324  | 7757 |          | erythrocyte membrane protein 1(PfEMP1)             | 1     |            |
| 381  | PF10_0001   | 28491    | 36165    | 7674 | 1886     | erythrocyte membrane protein 1(PfEMP1)             | 1     |            |
| 382  | PF10_0002   | 38051    | 39004    | 953  | 2770     | rifin                                              | 2     |            |
| 383  | PF10_0003   | 41774    | 42964    | 1190 | 1853     | rifin                                              | 2     |            |
| 384  | PF10_0004   | 44817    | 46134    | 1317 | 1919     | rifin                                              | 2     |            |
| 385  | PF10_0005   | 48053    | 50279    | 2226 | 1071     | rifin                                              | 2     |            |
| 386  | PF10_0006   | 51350    | 52600    | 1250 | 1943     | rifin                                              | 2     |            |
| 387  | PF10_0007   | 54543    | 54770    | 227  | 354      | hypothetical protein                               | 4     |            |
| 388  | PF10_0008   | 55124    | 55508    | 384  | 2461     | hypothetical protein                               | 4     |            |
| 389  | PF10_0009   | 57969    | 58981    | 1012 | 1087     | pseudogene, stevor, putative                       | 3     | 1          |
| 390  | PF10_0011   | 60068    | 60777    | 709  | 112      | erythrocyte membrane protein 1 (PfEMP1) pseudogene | 1     | 1          |
| 391  | PF10_0012   | 60889    | 61366    | 477  | 1787     | erythrocyte membrane protein 1 (PfEMP1) pseudogene | 1     | 1          |
| 392  | PF10_0013   | 63153    | 64033    | 880  | 3775     | hypothetical protein                               | 8     |            |
| 393  | PF10_0014   | 67808    | 68389    | 581  | 301      | hypothetical protein                               | 4     |            |
| 394  | PF10_0015   | 68690    | 68962    | 272  | 1586     | acyl CoA binding protein, putative                 | 13    |            |
| 395  | PF10_0016   | 70548    | 70820    | 272  | 2115     | acyl CoA binding protein, putative                 | 13    |            |
| 396  | PF10_0017   | 72935    | 73918    | 983  | 744      | hypothetical protein                               | 4     |            |
| 397  | PF10_0018   | 74662    | 77573    | 2911 | 3844     | hypothetical protein                               | 8     |            |
| 398  | PF10_0019   | 81417    | 81740    | 323  | 4799     | etramp / sep                                       | 14    |            |
| 399  | PF10_0020   | 86539    | 89010    | 2471 | 3564     | hypothetical protein                               | 8     |            |
| 400  | PF10_0021   | 92574    | 93527    | 953  | 2587     | hypothetical protein                               | 8     |            |
| 401  | PF10_0022   | 96114    | 96563    | 449  | 2817     | hypothetical protein                               | 9     |            |
| 402  | PF10_0023   | 99380    | 100362   | 982  | 2757     | hypothetical protein                               | 6     |            |
| 403  | PF10_0024   | 103119   | 104684   | 1565 | 1970     | hypothetical protein                               | 9     |            |
| 404  | PF10_0025   | 106654   | 108663   | 2009 | 4267     | PF70 protein                                       | 13    |            |
| 405  | PF10_0026   | 112930   | 116016   | 3086 | 1448589  | hypothetical protein                               | 9     |            |
| 406  | PF10_0378   | 1564605  | 1567485  | 2880 | 2113     | hypothetical protein                               | 8     |            |
| 407  | PF10_0379   | 1569598  | 1570677  | 1079 | 4821     | phospholipase, putative                            | 13    |            |
| 408  | PF10_0380   | 1575498  | 1578604  | 3106 | 2245     | FIKK10.2 / R45                                     | 11    |            |
| 409  | PF10_0381   | 1580849  | 1582212  | 1363 | 49       | hypothetical protein                               | 8     |            |
| 410  | PF10_0382   | 1582261  | 1582737  | 476  | 5750     | hypothetical protein                               | 9     |            |
| 411  | PF10_0383   | 1588487  | 1589500  | 1013 | 4441     | hypothetical protein, conserved (= PF11_0033)      | 9     |            |

| Rank | PlasmoDB ID | location | location | size | upstream | annotation                                                    | Group    | Pseudogene |
|------|-------------|----------|----------|------|----------|---------------------------------------------------------------|----------|------------|
| 412  | PF10_0384   | 1593941  | 1594165  | 224  | 328      | hypothetical protein                                          | 1        |            |
| 413  | PF10_0385   | 1594493  | 1594759  | 266  | 154      | PfEMP1 truncated, putative                                    | 1        |            |
| 414  | PF10_0386   | 1594913  | 1595113  | 200  | 70       | hypothetical protein                                          | 9        |            |
| 415  | PF10_0387   | 1595183  | 1595407  | 224  | 1528     | hypothetical protein                                          | 9        |            |
| 416  | PF10_0388   | 1596935  | 1597450  | 515  | 46       | hypothetical protein                                          | q-gene   |            |
| 417  | PF10_0389   | 1597496  | 1597762  | 266  | 605      | hypothetical protein                                          | q-gene   |            |
| 418  | PF10_0390   | 1598367  | 1598933  | 566  | 2359     | hypothetical protein                                          | pfmc-2tm |            |
| 419  | PF10_0391   | 1601292  | 1602066  | 774  | 1210     | hypothetical protein                                          | o-gene   |            |
| 420  | PF10_0392   | 1603276  | 1604394  | 1118 | 2295     | hypothetical protein                                          | n-gene   |            |
| 421  | PF10_0393   | 1606689  | 1607866  | 1177 | 1858     | rifin                                                         | 2        |            |
| 422  | PF10_0394   | 1609724  | 1610778  | 1054 | 1941     | rifin                                                         | 2        |            |
| 423  | PF10_0395   | 1612719  | 1613742  | 1023 | 2110     | stevor, putative                                              | 3        |            |
| 424  | PF10_0396   | 1615852  | 1617211  | 1359 | 2108     | rifin                                                         | 2        |            |
| 425  | PF10_0397   | 1619319  | 1620524  | 1205 | 2069     | rifin                                                         | 2        |            |
| 426  | PF10_0398   | 1622593  | 1623859  | 1266 | 2016     | rifin                                                         | 2        |            |
| 427  | PF10_0399   | 1625875  | 1627033  | 1158 | 2124     | rifin                                                         | 2        |            |
| 428  | PF10_0400   | 1629157  | 1630473  | 1316 | 2088     | rifin                                                         | 2        |            |
| 429  | PF10_0401   | 1632561  | 1633613  | 1052 | 2090     | rifin                                                         | 2        |            |
| 430  | PF10_0402   | 1635703  | 1636812  | 1109 | 2375     | rifin                                                         | 2        |            |
| 431  | PF10_0403   | 1639187  | 1640454  | 1267 | 1931     | rifin                                                         | 2        |            |
| 432  | PF10_0404   | 1642385  | 1643568  | 1183 | 2392     | rifin                                                         | 2        |            |
| 433  | PF10_0405   | 1645960  | 1647307  | 1347 | 1883     | rifin                                                         | 2        |            |
| 434  | PF10_0406   | 1649190  | 1656737  | 7547 |          | erythrocyte membrane protein 1(PfEMP1)                        | 1        |            |
| 435  | PF11_0001   | 5848     | 6090     | 242  | 731      | hypothetical protein                                          | 9        |            |
| 436  | PF11_0002   | 6821     | 7039     | 218  | 721      | hypothetical protein                                          | 9        |            |
| 437  | PF11_0003   | 7760     | 8149     | 389  | 3492     | hypothetical protein                                          | 9        |            |
| 438  | PF11_0004   | 11641    | 12734    | 1093 | 4314     | hypothetical protein                                          | 9        |            |
| 439  | PF11_0005   | 17048    | 17203    | 155  | 1344     | hypothetical protein                                          | 9        |            |
| 440  | PF11_0006   | 18547    | 18801    | 254  | 5359     | hypothetical protein                                          | 9        |            |
| 441  | PF11_0007   | 24160    | 31598    | 7438 | 1068     | erythrocyte membrane protein 1(PfEMP1)                        | 1        |            |
| 442  | PF11_0008   | 32666    | 42386    | 9720 | 2670     | erythrocyte membrane protein 1(PfEMP1)                        | 1        |            |
| 443  | PF11_0009   | 45056    | 46233    | 1177 | 1879     | rifin                                                         | 2        |            |
| 444  | PF11_0010   | 48112    | 49307    | 1195 | 2316     | rifin                                                         | 2        |            |
| 445  | PF11_0011   | 51623    | 52751    | 1128 | 1672     | rifin                                                         | 2        |            |
| 446  | PF11_0012   | 54423    | 54878    | 455  | 1914     | hypothetical protein, truncated                               | 4        |            |
| 447  | PF11_0013   | 56792    | 57840    | 1048 | 1558     | stevor, putative, degenerate                                  | 3        |            |
| 448  | PF11_0014   | 59398    | 60328    | 930  | 600      | hypothetical protein                                          | pfmc-2tm |            |
| 449  | PF11_0015   | 60928    | 61350    | 422  | 150      | hypothetical protein                                          | q-gene   |            |
| 450  | PF11_0016   | 61500    | 61718    | 218  | 2723     | hypothetical protein                                          | q-gene   |            |
| 451  | PF11_0522   | 64441    | 64842    | 401  | 1844     | pseudogene, erythrocyte membrane protein 1(PfEMP1), truncated | 1        |            |
| 452  | PF11_0529   | 66686    | 67965    | 1279 | 2116     | rifin                                                         | 2        |            |
| 453  | PF11_0020   | 70081    | 71289    | 1208 | 1955     | rifin                                                         | 2        |            |
| 454  | PF11_0021   | 73244    | 74442    | 1198 | 2378     | rifin                                                         | 2        |            |
| 455  | PF11_0022   | 76820    | 78000    | 1180 | 2309     | pseudogene, rifin, degenerate, putative                       | 2        | 1          |
| 456  | PF11_0023   | 80309    | 80878    | 569  | 1768     | hypothetical protein                                          | n-gene   |            |
| 457  | PF11_0024   | 82646    | 83420    | 774  | 2214     | hypothetical protein                                          | o-gene   |            |

| Rank | PlasmoDB ID | location | location | size  | upstream | annotation                                          | Group    | Pseudogene |
|------|-------------|----------|----------|-------|----------|-----------------------------------------------------|----------|------------|
| 458  | PF11_0025   | 85634    | 86423    | 789   | 623      | hypothetical protein                                | pfmc-2tm |            |
| 459  | PF11_0026   | 87046    | 87894    | 848   | 2557     | hypothetical protein                                | q-gene   |            |
| 460  | PF11_0523   | 90451    | 90879    | 428   | 2821     | erythrocyte membrane protein 1 (PfEMP1), truncated  | 1        | 1          |
| 461  | PF11_0032   | 93700    | 94028    | 328   | 307      | hypothetical protein                                | 9        |            |
| 462  | PF11_0033   | 94335    | 97225    | 2890  | 5748     | hypothetical protein                                | 9        |            |
| 463  | PF11_0034   | 102973   | 104851   | 1878  | 2793     | hypothetical protein                                | 8        |            |
| 464  | PF11_0035   | 107644   | 108618   | 974   | 3590     | hypothetical protein                                | 9        |            |
| 465  | PF11_0036   | 112208   | 114190   | 1982  | 2839     | hypothetical protein, conserved                     | 9        |            |
| 466  | PF11_0037   | 117029   | 119123   | 2094  | 2312     | hypothetical protein                                | 5        |            |
| 467  | PF11_0038   | 121435   | 122353   | 918   | 4053     | hypothetical protein                                | 6        |            |
| 468  | PF11_0039   | 126406   | 126681   | 275   | 2639     | etramp / sep                                        | 14       |            |
| 469  | PF11_0040   | 129320   | 129604   | 284   |          | etramp / sep                                        | 14       |            |
| 470  | PF11_0503   | 1931243  | 1932492  | 1249  | 6098     | hypothetical protein                                | 8        |            |
| 471  | PF11_0504   | 1938590  | 1939498  | 908   | 3190     | hypothetical protein                                | 9        |            |
| 472  | PF11_0505   | 1942688  | 1942957  | 269   | 4163     | hypothetical protein                                | 9        |            |
| 473  | PF11_0506   | 1947120  | 1948832  | 1712  | 281      | hypothetical protein                                | 1        |            |
| 474  | PF11_0507   | 1949113  | 1965636  | 16523 | 3674     | antigen 332, putative                               | 13       |            |
| 475  | PF11_0508   | 1969310  | 1970784  | 1474  | 2533     | hypothetical protein                                | 8        |            |
| 476  | PF11_0509   | 1973317  | 1976714  | 3397  | 2462     | ring-infected erythrocyte surface antigen, putative | 13       |            |
| 477  | PF11_0510   | 1979176  | 1981157  | 1981  | 1623     | FIKK11                                              | 11       |            |
| 478  | PF11_0511   | 1982780  | 1983346  | 566   | 4923     | hypothetical protein                                | 9        |            |
| 479  | PF11_0512   | 1988269  | 1990928  | 2659  | 7532     | ring-infected erythrocyte surface antigen 2, RESA-2 | 13       |            |
| 480  | PF11_0513   | 1998460  | 2000223  | 1763  | 1441     | hypothetical protein                                | 12       |            |
| 481  | PF11_0514   | 2001664  | 2001921  | 257   | 1695     | hypothetical protein, truncated                     | 4        |            |
| 482  | PF11_0515   | 2003616  | 2004739  | 1123  | 2046     | rifin                                               | 2        |            |
| 483  | PF11_0516   | 2006785  | 2007812  | 1027  | 2485     | stevor, putative                                    | 3        |            |
| 484  | PF11_0517   | 2010297  | 2011226  | 929   | 1336     | rifin                                               | 2        |            |
| 485  | PF11_0518   | 2012562  | 2013419  | 857   | 2205     | rifin, putative, truncated                          | 2        | 1          |
| 486  | PF11_0519   | 2015624  | 2016877  | 1253  | 1887     | rifin                                               | 2        |            |
| 487  | PF11_0520   | 2018764  | 2019944  | 1180  | 2783     | rifin                                               | 2        |            |
| 488  | PF11_0521   | 2022727  | 2032796  | 10069 |          | erythrocyte membrane protein 1 (PfEMP1)             | 1        |            |
| 489  | PFL0005w    | 16973    | 24497    | 7524  | 1824     | erythrocyte membrane protein 1 (PfEMP1)             | 1        |            |
| 490  | PFL0010c    | 26321    | 27687    | 1366  | 2391     | rifin                                               | 2        |            |
| 491  | PFL0015c    | 30078    | 31261    | 1183  | 1442     | rifin                                               | 2        |            |
| 492  | PFL0020w    | 32703    | 41940    | 9237  | 1860     | erythrocyte membrane protein 1 (PfEMP1)             | 1        |            |
| 493  | PFL0025c    | 43800    | 45106    | 1306  | 1682     | rifin                                               | 2        |            |
| 494  | PFL0030c    | 46788    | 56805    | 10017 | 4751     | erythrocyte membrane protein 1 (PfEMP1)             | 1        |            |
| 495  | PFL0035c    | 61556    | 64336    | 2780  | 4472     | octapeptide-repeat antigen, putative                | 13       |            |
| 496  | PFL0040c    | 68808    | 70867    | 2059  | 2362     | FIKK12                                              | 11       |            |
| 497  | PFL0045c    | 73229    | 74522    | 1293  | 2324     | hypothetical protein                                | 8        |            |
| 498  | PFL0050c    | 76846    | 79067    | 2221  | 2382     | hypothetical protein                                | 8        |            |
| 499  | PFL0055c    | 81449    | 84451    | 3002  | 5483     | protein with DNAJ domain (resa-like), putative      | 12       |            |
| 500  | PFL0060w    | 89934    | 90749    | 815   | 1493     | hypothetical protein                                | 8        |            |
| 501  | PFL0065w    | 92242    | 92562    | 320   | 1019     | hypothetical protein                                | 9        |            |
| 502  | PFL0070c    | 93581    | 97146    | 3565  |          | hypothetical protein                                | 8        |            |
| 503  | PFL2525c    | 2145250  | 2146600  | 1350  | 3938     | hypothetical protein                                | 9        |            |

| Rank | PlasmoDB ID | location | location | size  | upstream | annotation                                              | Group  | Pseudogene |
|------|-------------|----------|----------|-------|----------|---------------------------------------------------------|--------|------------|
| 504  | PFL2530w    | 2150538  | 2151899  | 1361  | 2703     | hypothetical protein                                    | 9      |            |
| 505  | PFL2535w    | 2154602  | 2156108  | 1506  | 3449     | RESA-like protein, putative                             | 13     |            |
| 506  | PFL2540w    | 2159557  | 2161599  | 2042  | 1092     | hypothetical protein                                    | 5      |            |
| 507  | PFL2545c    | 2162691  | 2162918  | 227   | 5312     | hypothetical protein                                    | 9      |            |
| 508  | PFL2550w    | 2168230  | 2169743  | 1513  | 1582     | hypothetical protein, conserved in <i>P. falciparum</i> | q-gene |            |
| 509  | PFL2555w    | 2171325  | 2172332  | 1007  | 1450     | hypothetical protein                                    | 4      |            |
| 510  | PFL2560c    | 2173782  | 2174108  | 326   | 1204     | hypothetical protein                                    | 9      |            |
| 511  | PFL2565w    | 2175312  | 2176070  | 758   | 4332     | hypothetical protein                                    | 4      |            |
| 512  | PFL2570w    | 2180402  | 2182852  | 2450  | 595      | acyl-coa ligase antigen                                 | 13     |            |
| 513  | PFL2575c    | 2183447  | 2184151  | 704   | 4592     | hypothetical protein                                    | 9      |            |
| 514  | PFL2580w    | 2188743  | 2189593  | 850   | 873      | RIFIN, pseudogene                                       | 2      | 1          |
| 515  | PFL2585c    | 2190466  | 2191753  | 1287  | 4387     | RIFIN                                                   | 2      |            |
| 516  | PFL2590w    | 2196140  | 2197105  | 965   | 1804     | hypothetical protein                                    | 4      |            |
| 517  | PFL2595w    | 2198909  | 2199540  | 631   | 77       | hypothetical protein                                    | 4      |            |
| 518  | PFL2600w    | 2199617  | 2199829  | 212   | 1649     | hypothetical protein                                    | 4      |            |
| 519  | PFL2605w    | 2201478  | 2202669  | 1191  | 2038     | rifin                                                   | 2      |            |
| 520  | PFL2610w    | 2204707  | 2205697  | 990   | 2116     | stevor                                                  | 3      |            |
| 521  | PFL2615w    | 2207813  | 2209098  | 1285  | 2449     | rifin                                                   | 2      |            |
| 522  | PFL2620w    | 2211547  | 2212537  | 990   | 2117     | stevor                                                  | 3      |            |
| 523  | PFL2625w    | 2214654  | 2216002  | 1348  | 2433     | rifin                                                   | 2      |            |
| 524  | PFL2630w    | 2218435  | 2219516  | 1081  | 2323     | rifin                                                   | 2      |            |
| 525  | PFL2635w    | 2221839  | 2222831  | 992   | 2149     | stevor                                                  | 3      |            |
| 526  | PFL2640c    | 2224980  | 2226184  | 1204  | 2431     | rifin                                                   | 2      |            |
| 527  | PFL2645c    | 2228615  | 2229723  | 1108  | 2951     | rifin                                                   | 2      |            |
| 528  | PFL2650w    | 2232674  | 2232886  | 212   | 1697     | hypothetical protein, truncated                         | 4      |            |
| 529  | PFL2655w    | 2234583  | 2235775  | 1192  | 2418     | rifin                                                   | 2      |            |
| 530  | PFL2660w    | 2238193  | 2239400  | 1207  | 1854     | rifin                                                   | 2      |            |
| 531  | PFL2665c    | 2241254  | 2248945  | 7691  |          | erythrocyte membrane protein 1 (PfEMP1)                 | 1      |            |
| 532  | MAL13P1.1   | 21467    | 28890    | 7423  | 1818     | erythrocyte membrane protein 1 (PfEMP1)                 | 1      |            |
| 533  | MAL13P1.2   | 30708    | 31984    | 1276  | 2078     | RIFIN                                                   | 2      |            |
| 534  | PF13_0003   | 34062    | 44845    | 10783 | 2841     | erythrocyte membrane protein 1 (PfEMP1)                 | 1      |            |
| 535  | PF13_0004   | 47686    | 48872    | 1186  | 1893     | RIFIN                                                   | 2      |            |
| 536  | PF13_0005   | 50765    | 51960    | 1195  | 2210     | RIFIN                                                   | 2      |            |
| 537  | PF13_0006   | 54170    | 55362    | 1192  | 1850     | RIFIN                                                   | 2      |            |
| 538  | MAL13P1.4   | 57212    | 58525    | 1313  | 1675     | RIFIN                                                   | 2      |            |
| 539  | MAL13P1.6   | 60200    | 61275    | 1075  | 1343     | erythrocyte membrane protein 1-like                     | 1      |            |
| 540  | MAL13P1.7   | 62618    | 63650    | 1032  | 2001     | stevor                                                  | 3      |            |
| 541  | MAL13P1.8   | 65651    | 66919    | 1268  | 1668     | RIF pseudogene                                          | 2      | 1          |
| 542  | MAL13P1.11a | 68587    | 68799    | 212   | 55       | hypothetical protein, conserved in <i>P. falciparum</i> | 4      |            |
| 543  | MAL13P1.11  | 68854    | 69514    | 660   | 3688     | hypothetical protein                                    | 4      |            |
| 544  | PF13_0010   | 73202    | 74516    | 1314  | 4375     | Gbph2                                                   | 13     |            |
| 545  | MAL13P1.58  | 78891    | 79681    | 790   | 3140     | hypothetical protein                                    | 4      |            |
| 546  | PF13_0073   | 82821    | 84121    | 1300  | 1545     | hypothetical protein                                    | 8      |            |
| 547  | MAL13P1.59  | 85666    | 86727    | 1061  | 2695     | hypothetical protein                                    | 4      |            |
| 548  | MAL13P1.60  | 89422    | 93455    | 4033  | 6196     | erythrocyte binding antigen 140                         | 13     |            |
| 549  | MAL13P1.61  | 99651    | 100624   | 973   | 2321     | hypothetical protein                                    | 6      |            |

| Rank | PlasmoDB ID | location | location | size | upstream | annotation                                          | Group  | Pseudogene |
|------|-------------|----------|----------|------|----------|-----------------------------------------------------|--------|------------|
| 550  | PF13_0074   | 102945   | 108482   | 5537 | 55       | SURFIN, surface-associated interspersed gene        | 10     |            |
| 551  | PF13_0075   | 108537   | 109574   | 1037 | 224      | SURFIN, surface-associated interspersed gene        | 10     |            |
| 552  | MAL13P1.62  | 109798   | 110371   | 573  | 2524     | hypothetical protein                                | 9      |            |
| 553  | PF13_0076   | 112895   | 113918   | 1023 | 7922     | hypothetical protein                                | 7      |            |
| 554  | PF13_0011   | 121840   | 122493   | 653  | 1437     | plasmodium falciparum gamete antigen 27/25          | 13     |            |
| 555  | PF13_0012   | 123930   | 124619   | 689  |          | hypothetical protein                                | 9      |            |
| 556  | MAL13P1.440 | 2800477  | 2801371  | 894  | 126      | hypothetical protein, pseudogene                    | 9      | 1          |
| 557  | MAL13P1.450 | 2801497  | 2801729  | 232  | 452      | hypothetical protein, conserved in P. falciparum    | 9      |            |
| 558  | MAL13P1.455 | 2802181  | 2802348  | 167  | 292      | conserved hypothetical protein                      | 9      |            |
| 559  | MAL13P1.460 | 2802640  | 2803129  | 489  | 4044     | conserved hypothetical protein                      | 9      |            |
| 560  | MAL13P1.465 | 2807173  | 2807664  | 491  | 2282     | hypothetical protein                                | 9      |            |
| 561  | MAL13P1.470 | 2809946  | 2811316  | 1370 | 2731     | hypothetical protein                                | 7      |            |
| 562  | MAL13P1.475 | 2814047  | 2816049  | 2002 | 1684     | hypothetical protein conserved in P. falciparum     | 5      |            |
| 563  | MAL13P1.480 | 2817733  | 2818697  | 964  | 4404     | histidine-rich protein iii                          | 13     |            |
| 564  | MAL13P1.485 | 2823101  | 2825692  | 2591 | 1003     | acyl-coa ligase antigen                             | 13     |            |
| 565  | MAL13P1.490 | 2826695  | 2827778  | 1083 | 1018     | Stevor                                              | 3      |            |
| 566  | MAL13P1.495 | 2828796  | 2830233  | 1437 | 2140     | RIFIN                                               | 2      |            |
| 567  | MAL13P1.500 | 2832373  | 2833648  | 1275 | 2428     | RIFIN                                               | 2      |            |
| 568  | MAL13P1.505 | 2836076  | 2837076  | 1000 | 1054     | STEVOR                                              | 3      |            |
| 569  | MAL13P1.510 | 2838130  | 2839434  | 1304 | 1699     | erythrocyte membrane protein 1 (PfEMP1), pseudogene | 1      | 1          |
| 570  | MAL13P1.515 | 2841133  | 2842372  | 1239 | 1701     | RIFIN                                               | 2      |            |
| 571  | MAL13P1.520 | 2844073  | 2845298  | 1225 | 2903     | RIFIN                                               | 2      |            |
| 572  | MAL13P1.525 | 2848201  | 2848410  | 209  | 1708     | conserved hypothetical                              | 4      |            |
| 573  | MAL13P1.530 | 2850118  | 2851348  | 1230 | 2453     | RIFIN                                               | 2      |            |
| 574  | MAL13P1.535 | 2853801  | 2855163  | 1362 | 1833     | RIFIN                                               | 2      |            |
| 575  | MAL13P1.356 | 2856996  | 2864550  | 7554 |          | erythrocyte membrane protein 1 (PfEMP1)             | 1      | 1          |
| 576  | PF14_0001   | 1394     | 5344     | 3950 | 1865     | erythrocyte membrane protein 1 (PfEMP1) pseudogene  | 1      | 1          |
| 577  | PF14_0002   | 7209     | 8539     | 1330 | 2436     | RIFIN                                               | 2      |            |
| 578  | PF14_0003   | 10975    | 12118    | 1143 | 2009     | RIFIN                                               | 2      |            |
| 579  | PF14_0004   | 14127    | 15364    | 1237 | 2106     | RIFIN                                               | 2      |            |
| 580  | PF14_0005   | 17470    | 18809    | 1339 | 2089     | RIFIN                                               | 2      |            |
| 581  | PF14_0006   | 20898    | 22233    | 1335 | 2105     | RIFIN                                               | 2      |            |
| 582  | PF14_0007   | 24338    | 25321    | 983  | 2001     | stevor, putative                                    | 3      |            |
| 583  | PF14_0008   | 27322    | 28429    | 1107 | 1655     | RIFIN                                               | 2      |            |
| 584  | PF14_0009   | 30084    | 31009    | 925  | 3685     | hypothetical protein                                | 4      |            |
| 585  | PF14_0010   | 34694    | 35774    | 1080 | 5516     | glycophorin binding protein-related antigen         | 13     |            |
| 586  | PF14_0013   | 41290    | 43151    | 1861 | 3683     | hypothetical protein                                | q-gene |            |
| 587  | PF14_0014   | 46834    | 47745    | 911  | 1168     | hypothetical protein                                | 7      |            |
| 588  | PF14_0015   | 48913    | 50416    | 1503 | 2996     | aminopeptidase, putative                            | 13     |            |
| 589  | PF14_0016   | 53412    | 53735    | 323  | 3438     | etramp / sep                                        | 14     |            |
| 590  | PF14_0017   | 57173    | 58294    | 1121 | 3071     | lysophospholipase, putative                         | 13     |            |
| 591  | PF14_0018   | 61365    | 63224    | 1859 | 3045     | hypothetical protein                                | 8      |            |
| 592  | PF14_0019   | 66269    | 67081    | 812  |          | hypothetical protein                                | 9      |            |
| 593  | PF14_0740   | 3167633  | 3169163  | 1530 | 130      | hypothetical protein                                | 8      |            |
| 594  | PF14_0741   | 3169293  | 3170762  | 1469 | 1280     | hypothetical protein                                | 9      |            |
| 595  | PF14_0742   | 3172042  | 3172714  | 672  | 2224     | hypothetical protein                                | 9      |            |

| Rank | PlasmoDB ID | location | location | size | upstream | annotation                                         | Group | Pseudogene |
|------|-------------|----------|----------|------|----------|----------------------------------------------------|-------|------------|
| 596  | PF14_0743   | 3174938  | 3175528  | 590  | 3166     | hypothetical protein                               | 9     |            |
| 597  | PF14_0744   | 3178694  | 3179680  | 986  | 3029     | hypothetical protein                               | 4     |            |
| 598  | PF14_0745   | 3182709  | 3183422  | 713  | 4536     | hypothetical protein                               | 4     |            |
| 599  | PF14_0746   | 3187958  | 3189618  | 1660 | 2737     | hypothetical protein                               | 5     |            |
| 600  | PF14_0747   | 3192355  | 3198548  | 6193 | 3103     | SURFIN, surface-associated interspersed gene       | 10    |            |
| 601  | PF14_0748   | 3201651  | 3203087  | 1436 | 3610     | hypothetical protein                               | 4     |            |
| 602  | PF14_0749   | 3206697  | 3206969  | 272  | 1230     | acyl CoA binding protein                           | 13    |            |
| 603  | PF14_0751   | 3208199  | 3210644  | 2445 | 2007     | fatty acyl coenzyme A synthetase-1, putative       | 13    |            |
| 604  | PF14_0752   | 3212651  | 3213687  | 1036 | 1782     | hypothetical protein                               | 4     |            |
| 605  | PF14_0753   | 3215469  | 3216366  | 897  | 2623     | hypothetical protein                               | 6     |            |
| 606  | PF14_0754   | 3218989  | 3219339  | 350  | 657      | hypothetical protein                               | 9     |            |
| 607  | PF14_0755   | 3219996  | 3220646  | 650  | 1712     | hypothetical protein                               | 6     |            |
| 608  | PF14_0756   | 3222358  | 3223702  | 1344 | 4040     | hypothetical protein                               | 9     |            |
| 609  | PF14_0757   | 3227742  | 3228659  | 917  | 3050     | hypothetical protein                               | 4     |            |
| 610  | PF14_0758   | 3231709  | 3235605  | 3896 | 2610     | hypothetical protein                               | 7     |            |
| 611  | PF14_0759   | 3238215  | 3238670  | 455  | 3309     | hypothetical protein                               | 9     |            |
| 612  | PF14_0760   | 3241979  | 3242699  | 720  | 10463    | hypothetical protein                               | 8     |            |
| 613  | PF14_0761   | 3253162  | 3255624  | 2462 | 581      | fatty acyl CoA synthetase 1                        | 13    |            |
| 614  | PF14_0762   | 3256205  | 3256911  | 706  | 2904     | hypothetical protein                               | 9     |            |
| 615  | PF14_0763   | 3259815  | 3260797  | 982  | 1816     | hypothetical protein                               | 4     |            |
| 616  | PF14_0764   | 3262613  | 3263271  | 658  | 55       | hypothetical protein                               | 4     |            |
| 617  | PF14_0765   | 3263326  | 3263538  | 212  | 1668     | hypothetical protein                               | 4     |            |
| 618  | PF14_0766   | 3265206  | 3266447  | 1241 | 2117     | RIFIN                                              | 2     |            |
| 619  | PF14_0767   | 3268564  | 3269566  | 1002 | 2405     | stevor, putative                                   | 3     |            |
| 620  | PF14_0768   | 3271971  | 3272918  | 947  | 2382     | RIFIN                                              | 2     |            |
| 621  | PF14_0769   | 3275300  | 3276571  | 1271 | 1999     | RIFIN                                              | 2     |            |
| 622  | PF14_0770   | 3278570  | 3279732  | 1162 | 2088     | RIFIN                                              | 2     |            |
| 623  | PF14_0771   | 3281820  | 3282822  | 1002 | 2148     | stevor, putative                                   | 3     |            |
| 624  | PF14_0772   | 3284970  | 3286073  | 1103 | 3950     | RIFIN                                              | 2     |            |
| 625  | PF14_0773   | 3290023  | 3290571  | 548  |          | erythrocyte membrane protein 1 (PFEMP1) pseudogene | 1     | 1          |

| Family                    | Group |
|---------------------------|-------|
| Var supergene             | 1     |
| Rif                       | 2     |
| Stevor                    | 3     |
| PHISTa                    | 4     |
| PHISTb                    | 5     |
| Pexel with 2TM            | 6     |
| Pexel with 1TM            | 7     |
| Pexel no TM               | 8     |
| Hypo w/o PEXEL            | 9     |
| Surfin                    | 10    |
| FIKK                      | 11    |
| Heat shock protein / DNAJ | 12    |
| Other annotated genes     | 13    |
| etramp / sep              | 14    |
