# Supplementary material for: A highly conserved segmental duplication in the subtelomeres of Plasmodium falciparum chromosomes varies in copy number
Source: PubMed Central journal article supplement (PMC2279139; doi:10.1186/1475-2875-7-46), 2008-03-07
Supplement: 1475-2875-7-46-S3.pdf [file 1475-2875-7-46-S3.pdf]

### Additional File 3. SNPs in *n*-, *o*-, *pfmc-2tm* and *q*-gene found in different *P.f.* strains

| Gene            | Reference Gene / remarks | start  | end    | bp surveyed | SNP Position | NS | S | 3D7 | FCR3 | TM180 | 7G8 | UAS39 | UAS31 | 7G8* | Dd2* | D10* | HB3* |     |   |   |
|-----------------|--------------------------|--------|--------|-------------|--------------|----|---|-----|------|-------|-----|-------|-------|------|------|------|------|-----|---|---|
| <i>n-gene</i>   | PFA0055c                 | 69594  | 70343  | 749         | 69760        | +  |   | T/C | C    | C     | T/C | T/C   | T/C   | C    | C    | C    | C    |     |   |   |
|                 |                          |        |        |             | 69761        | +  |   | A/G | G    | G     | G   | A/G   | G     |      |      |      |      |     |   |   |
|                 |                          |        |        |             | 69779        | +  |   | T/G | G    | T/G   | G   | G     | G     | G    | G    | G    | G    | G   | G | G |
|                 |                          |        |        |             | 69947        | +  |   | A   | A/G  | A/G   | A/G | A/G   | A/G   | A/G  | A/G  | A/G  | A/G  | A/G | A | A |
| <i>o-gene</i>   | no SNP detected          |        |        | 560         |              |    |   |     |      |       |     |       |       |      |      |      |      |     |   |   |
| <i>pfmc-2tm</i> | variant gene family      |        |        | 544         |              |    |   |     |      |       |     |       |       |      |      |      |      |     |   |   |
| <i>q-gene</i>   | PF07_0002                | 127855 | 128703 | 746         | 127990       | +  |   | G/A | G    | G     | G/A | G/A   | G     |      |      |      |      |     |   |   |
|                 |                          |        |        |             | 128383       | +  |   | A/G | A/G  | A     | A   | A     | A/G   |      |      |      |      |     |   |   |
|                 |                          |        |        |             | 128396       | +  |   | A/G | A/G  | A     | A   | A     | A/G   |      |      |      |      |     |   |   |
|                 |                          |        |        |             | 127872       |    | + | T   | -    | -     | -   | -     | -     | -    | -    | -    | -    | C   |   | T |
|                 |                          |        |        |             | 127880       | +  |   | A/G | -    | -     | -   | -     | -     | -    | -    | -    | -    | A   |   | A |
|                 |                          |        |        |             | 127897       |    | + | A/G | -    | -     | -   | -     | -     | -    | -    | -    | -    | A   |   | A |

Sequences were manually curated by visualization of the chromatograms. Criteria for true SNPs are: (1) SNP present in at least two parasites. (2) At least two sequences showing the particular SNP in one of the parasites.

NS, non-synonymous; S, synonymous; \* information acquired from [39]; - sequenced area not covered
